# Supplementary material
Source: PubMed Central journal article supplement (PMC1415310)

PARP2

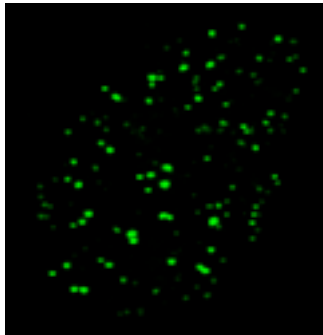

TRF2

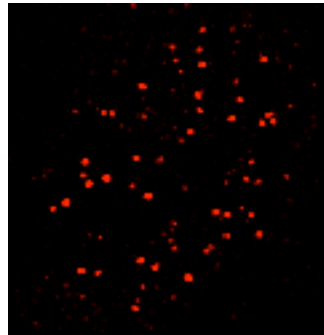

Merge

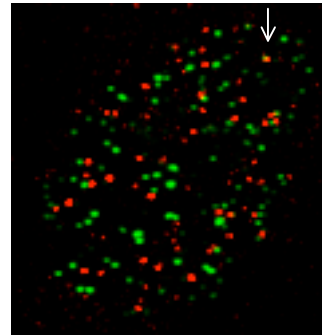

Supplement: mbc_E05-07-0672_1.pdf [file mbc_E05-07-0672_1.pdf]

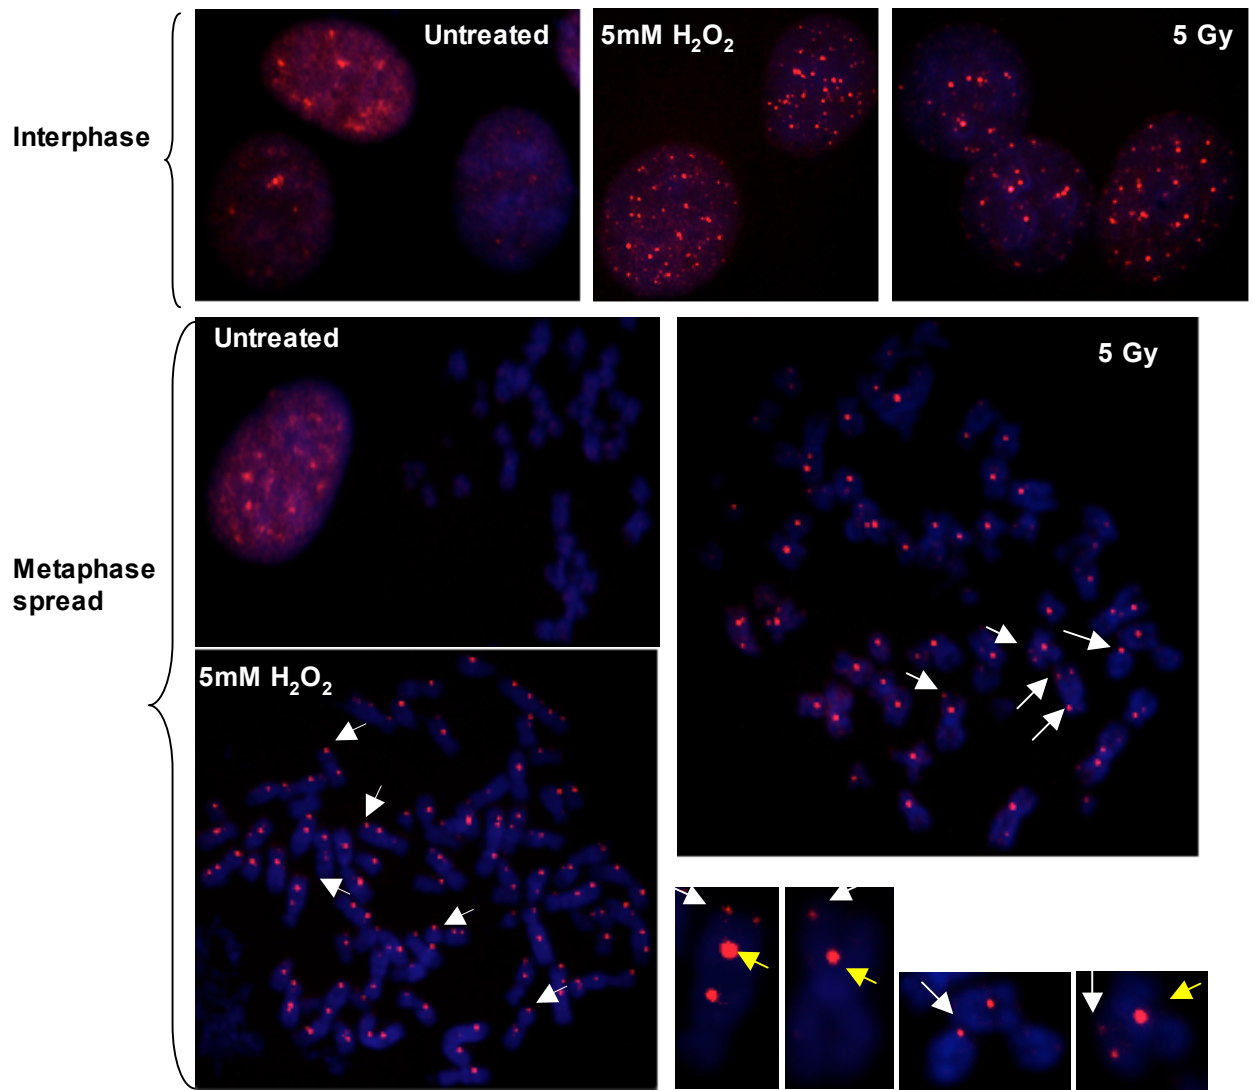

Supplement: mbc_E05-07-0672_2.pdf [file mbc_E05-07-0672_2.pdf]

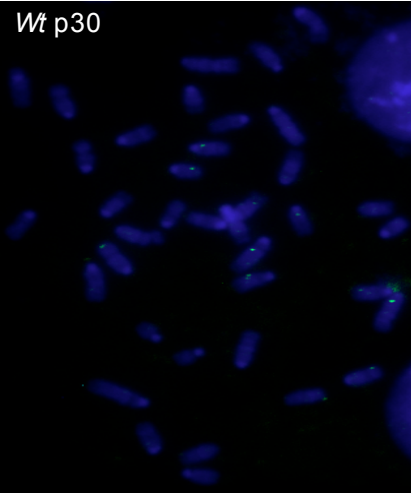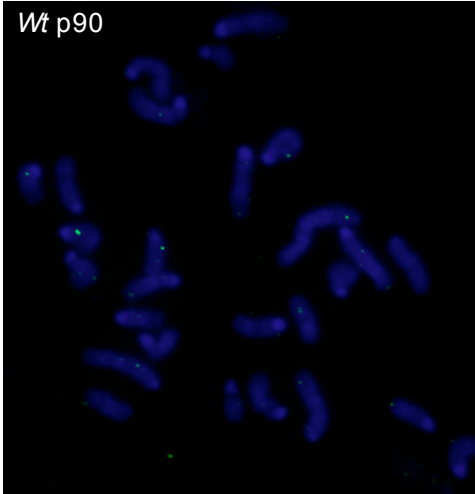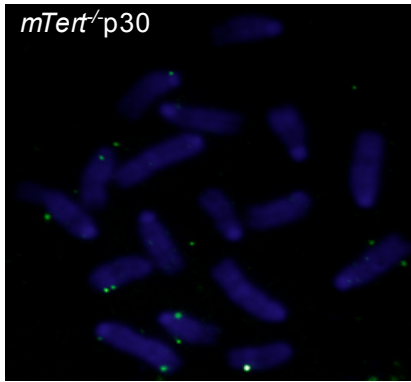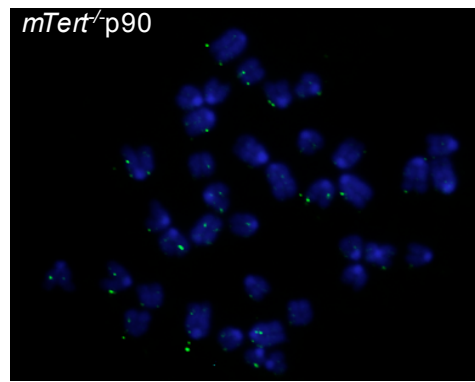

Supplement: mbc_E05-07-0672_3.pdf [file mbc_E05-07-0672_3.pdf]
